# Supplementary material
Source: MDPI journal article supplement (https://www.mdpi.com/2077-0472/13/10/1980)
Supplement: s1 [file s1]

## *Supplementary Material*

**Physical-chemical and metataxonomic characterization of the microbial communities present during the fermentation of three varieties of coffee from Colombia and their sensory qualities**

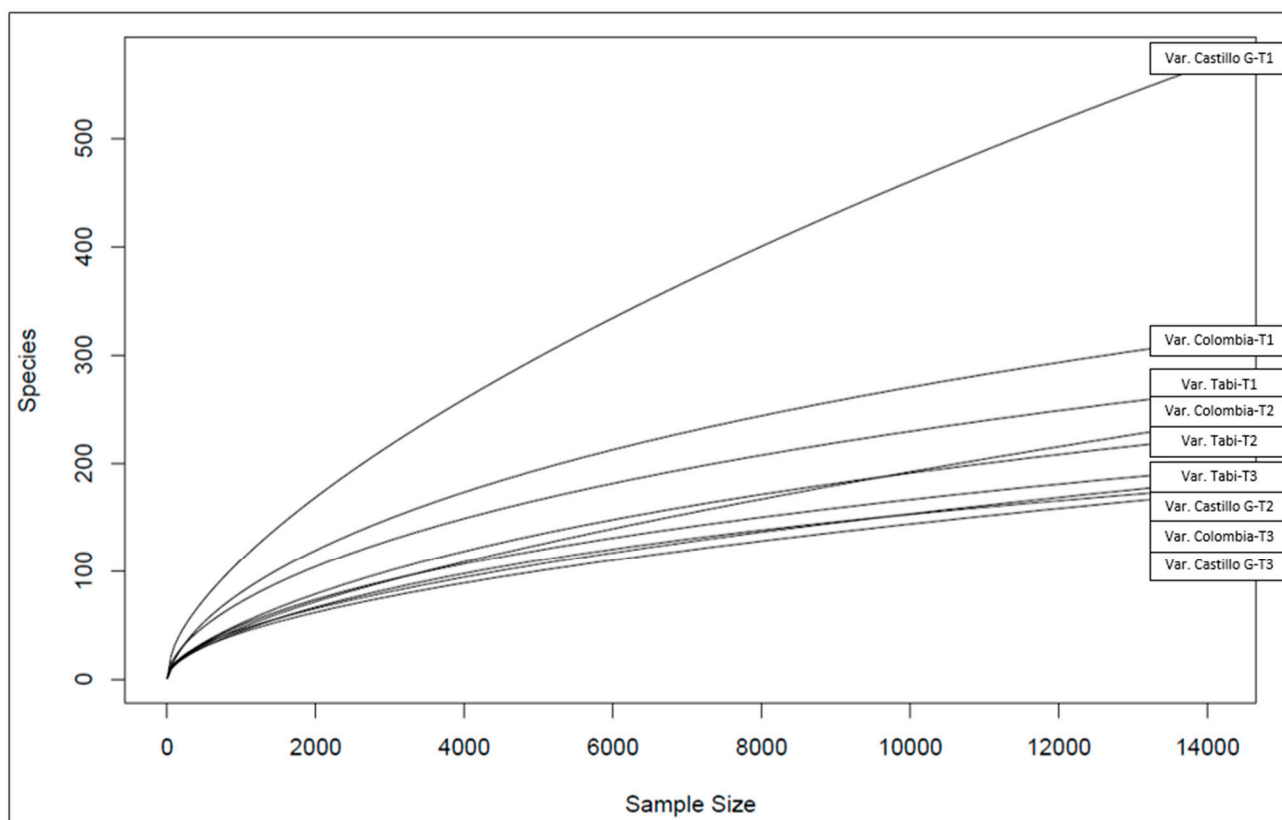

**Supplementary Figure S1.** Rarefaction analysis of 16S rDNA sequencing from three variety coffee samples during fermentation

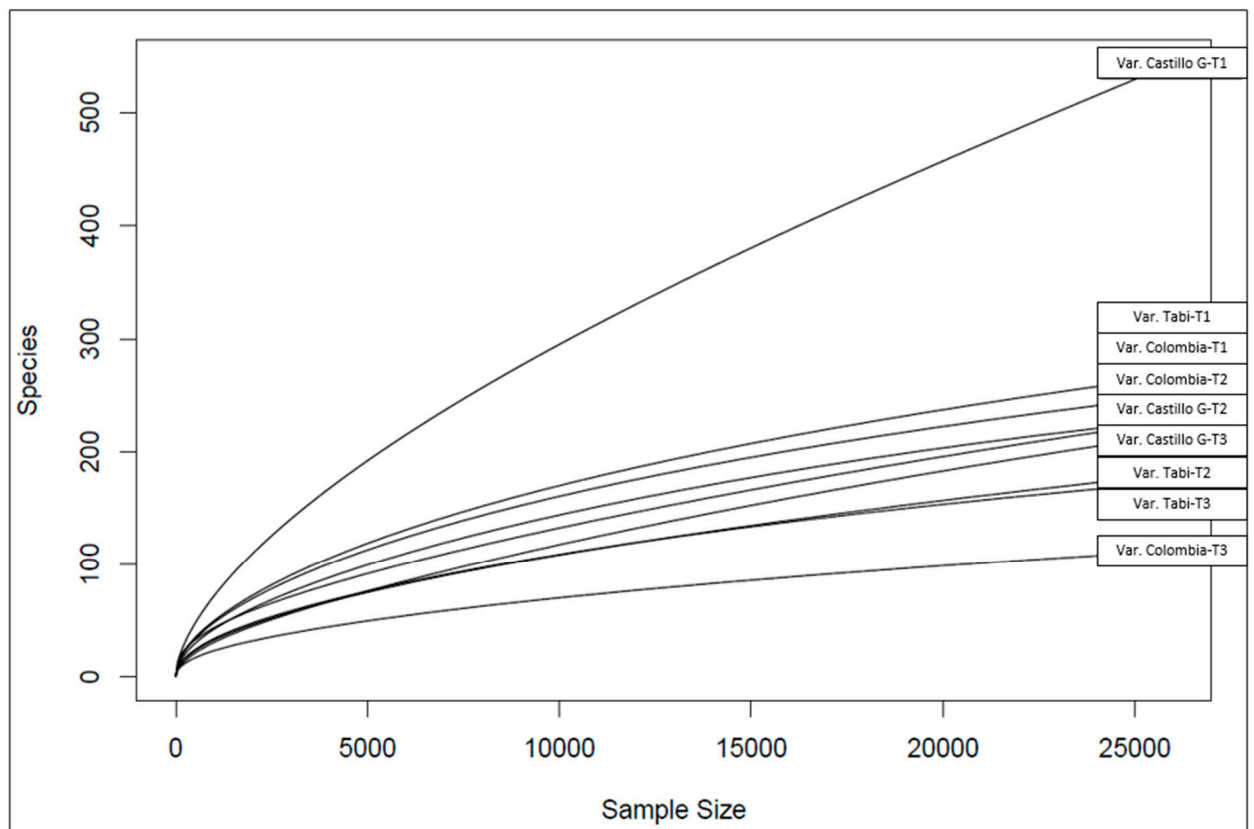

**Supplementary Figure S2.** Rarefaction analysis of ITS sequencing from three variety coffee samples during fermentation

**Supplementary Table S1.** Characterization of the coffee harvest at the Pueblo Bello Experimental Station.

| Variety          |            | 1 (Green)* | 2 (bright green)* | 3 (bright)* | 4 (Ripe 1)* | 5 (Ripe 2)* | 6 (Overripe 1)* | 7 (Overripe 2)* | 8 (Dry)* | Total | Percentage ** | Category |
|------------------|------------|------------|-------------------|-------------|-------------|-------------|-----------------|-----------------|----------|-------|---------------|----------|
| Tabi             | Fruits     | 1          | 10                | 20          | 30          | 34          | 28              | 74              | 8        | 205   | 0.38%         | Excelent |
|                  | weight (g) | 0.9        | 14                | 32          | 49          | 60          | 50              | 108             | 8        | 322   |               |          |
| Castillo General | Fruits     | 1          | 16                | 13          | 23          | 50          | 33              | 17              | 50       | 203   | 0.38%         | Excelent |
|                  | weight (g) | 0.9        | 21                | 18          | 38          | 87          | 64              | 28              | 61       | 318   |               |          |
| Colombia         | Fruits     | 0          | 13                | 50          | 43          | 35          | 35              | 12              | 10       | 198   | 0             | Excelent |
|                  | weight (g) | 0          | 17                | 80          | 75          | 63          | 43              | 21              | 12       | 311   |               |          |

**\*According color chart Cromacafé (Peñuela-Martínez, Guerrero and Sanz-Uribe, 2022)**

**\*\* The percentage is calculated according to standardized and validated reference values during the development of the tool. (Guerrero, Á. et al., 2022)**

**Peñuela-Martínez, A. E., Guerrero, Á., & Sanz-Uribe, J. R. Cromacafé® Herramienta para identificar los estados de madurez de las variedades de café de fruto rojo. Av. Téc. Cenicafe 2022, 535, 1-8. <https://doi.org/10.38141/10779/0535>**

**Guerrero, Á.; Sanz-Uribe, J.R.; Peñuela-Martínez, A.E.; Ramírez, C.A. Mediverdes®: Un Método Para Medir La Calidad de La Recolección Del Café En El Campo. Av. Téc. Cenicafe 2022, 536, 1–8, <https://doi.org/10.38141/10779/0536>**

**Supplementary Table S2.** Results of deep sequencing of 16S rDNA with the MiSeq platform from Illumina.

| Sample                 | Time (h) | Read Count | Q30 (%) | nseqs | Coverage |
|------------------------|----------|------------|---------|-------|----------|
| <b>Var. Tabi</b>       | 0        | 118.868    | 88.2    | 14040 | 0.992094 |
|                        | 9        | 117.282    | 87.6    | 14075 | 0.992753 |
|                        | 18       | 131.202    | 86.2    | 14112 | 0.994827 |
| <b>Var. Castillo G</b> | 0        | 181.354    | 85.7    | 14236 | 0.975204 |
|                        | 9        | 144.110    | 85.2    | 14067 | 0.993957 |
|                        | 18       | 145.806    | 86.7    | 14070 | 0.993603 |
| <b>Var. Colombia</b>   | 0        | 177.358    | 85.9    | 14085 | 0.990486 |
|                        | 9        | 218.258    | 86.2    | 14133 | 0.989528 |
|                        | 18       | 150.016    | 86.8    | 14073 | 0.993249 |

**Supplementary Table S3.** Results of deep sequencing of ITS with the MiSeq platform from Illumina

| Sample                 | Time (h) | Read Count | Q30 (%) | nseqs | Coverage |
|------------------------|----------|------------|---------|-------|----------|
| <b>Var. Tabi</b>       | 0        | 285.520    | 87.1    | 62447 | 0.995084 |
|                        | 9        | 287.878    | 88.4    | 66976 | 0.996073 |
|                        | 18       | 307.270    | 88.5    | 69766 | 0.996574 |
| <b>Var. Castillo G</b> | 0        | 227.942    | 82.8    | 41252 | 0.993067 |
|                        | 9        | 168.102    | 84.6    | 26035 | 0.995084 |
|                        | 18       | 148.114    | 86.5    | 34705 | 0.996254 |
| <b>Var. Colombia</b>   | 0        | 223.286    | 87.0    | 59377 | 0.994476 |
|                        | 9        | 295.318    | 83.9    | 67039 | 0.995585 |
|                        | 18       | 256.732    | 89.0    | 72459 | 0.997129 |
